# Supplementary material for: Assessing internal changes in the future structure of Dry-Hotcompound events. The case of the Pyrenees
Source: Copernicus journal article supplement (doi:10.5194/nhess-2021-5), 2021-01-14
Supplement: Supplementary file 1 [file nhess-2021-5-supplement.pdf]

1    **SUPPLEMENT**

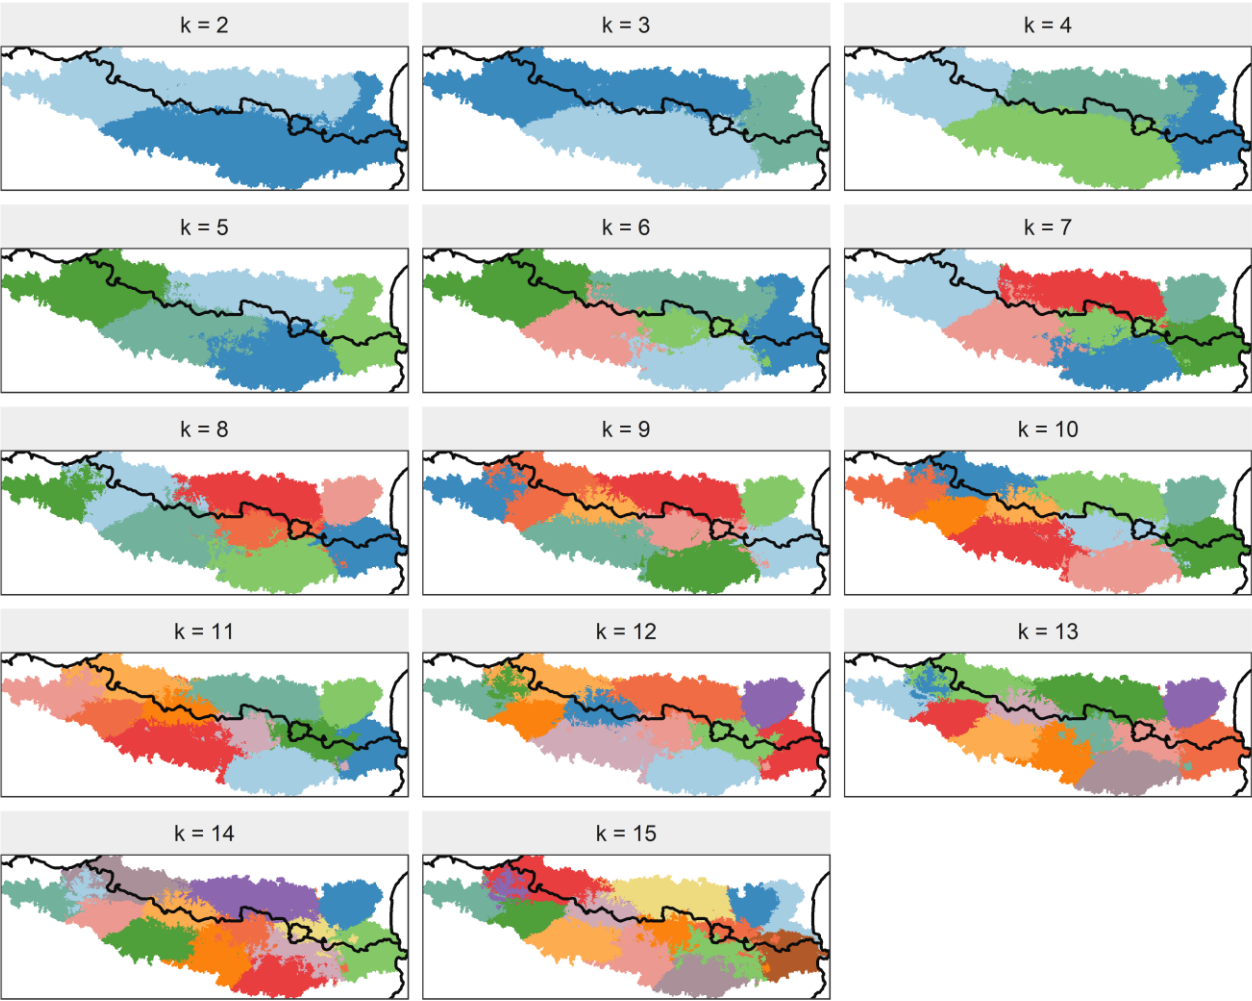

2

3    **Figure S1. Regionalization of spring and summer precipitation and temperature during the 1981–2015 period for  $k = 2, 3, \dots, 15$**

4    **clusters.**

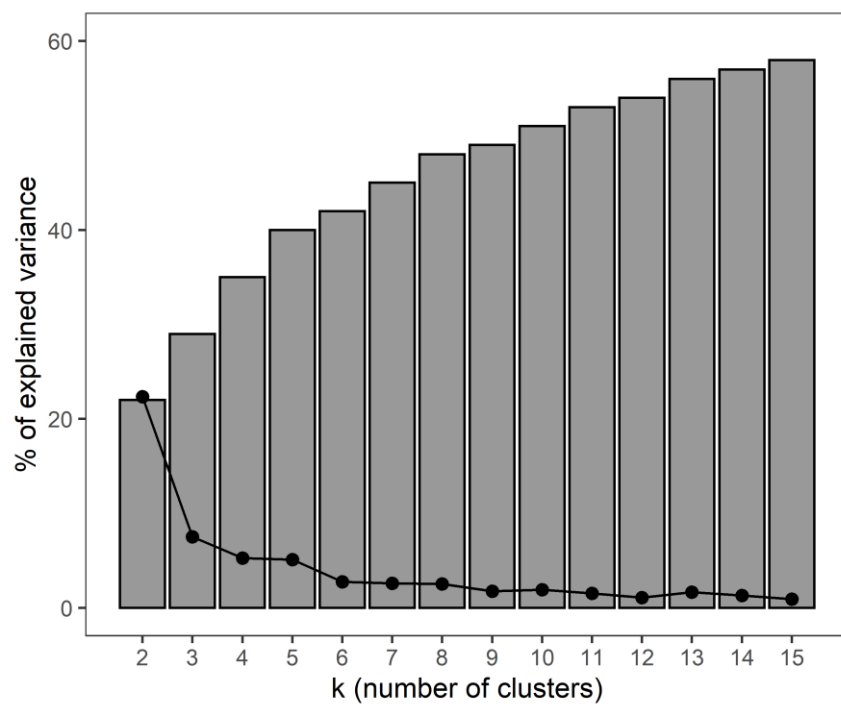

5

6

7

8

Figure S2. Scree test for the number of clusters. The slope changes considered for the selection of the number of regions were  $k = 5$  and  $k = 8$ , the latter being the definitive number of regions

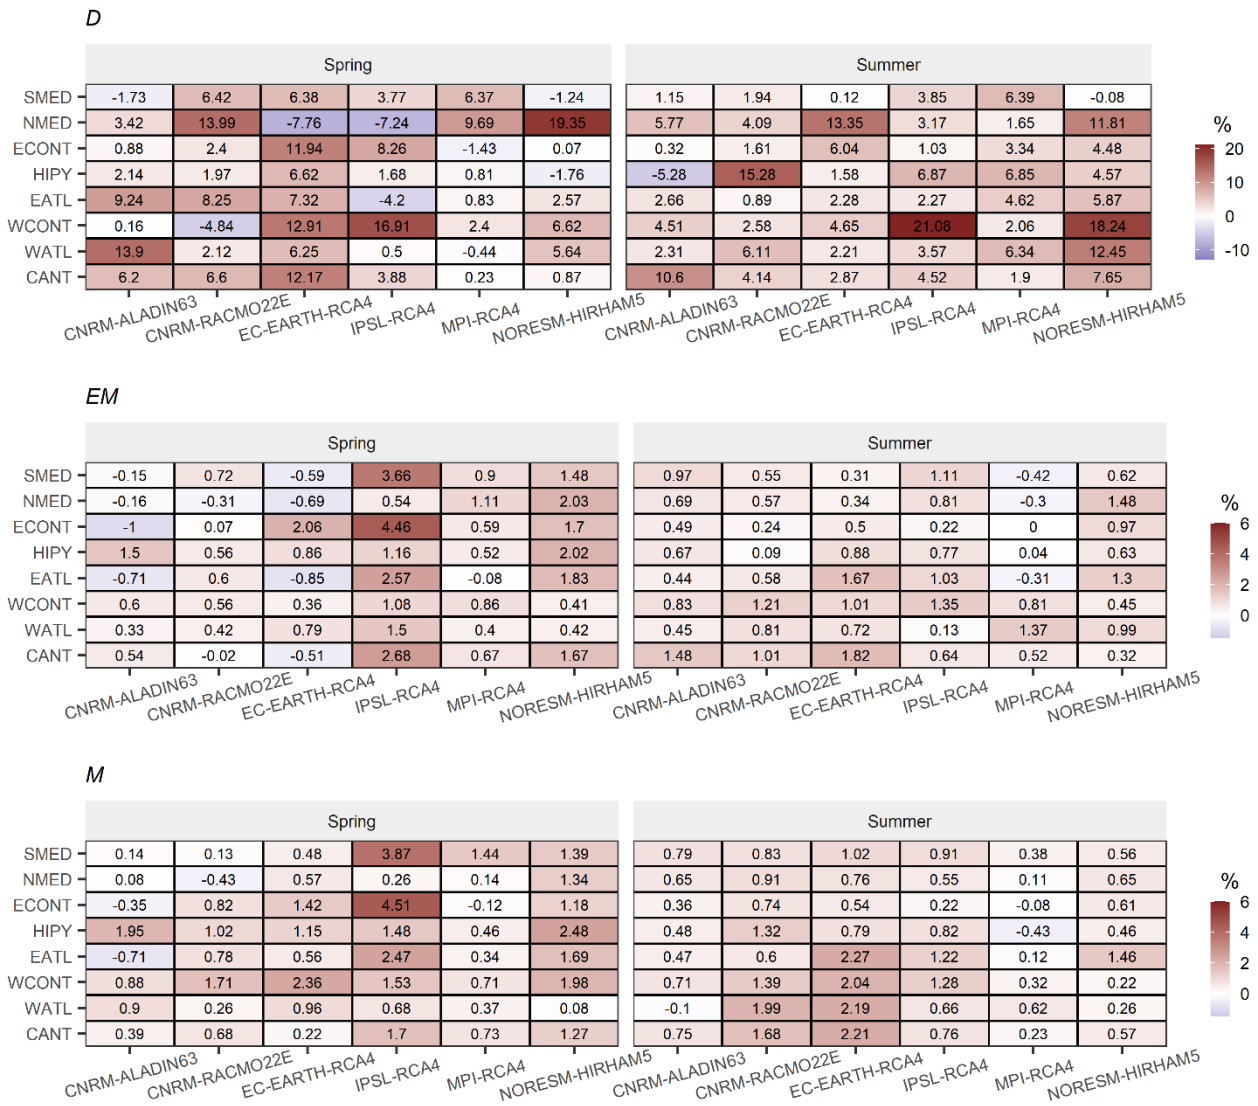

**Figure S3. Biases in the variability for each variable, region and model, and for each season.**

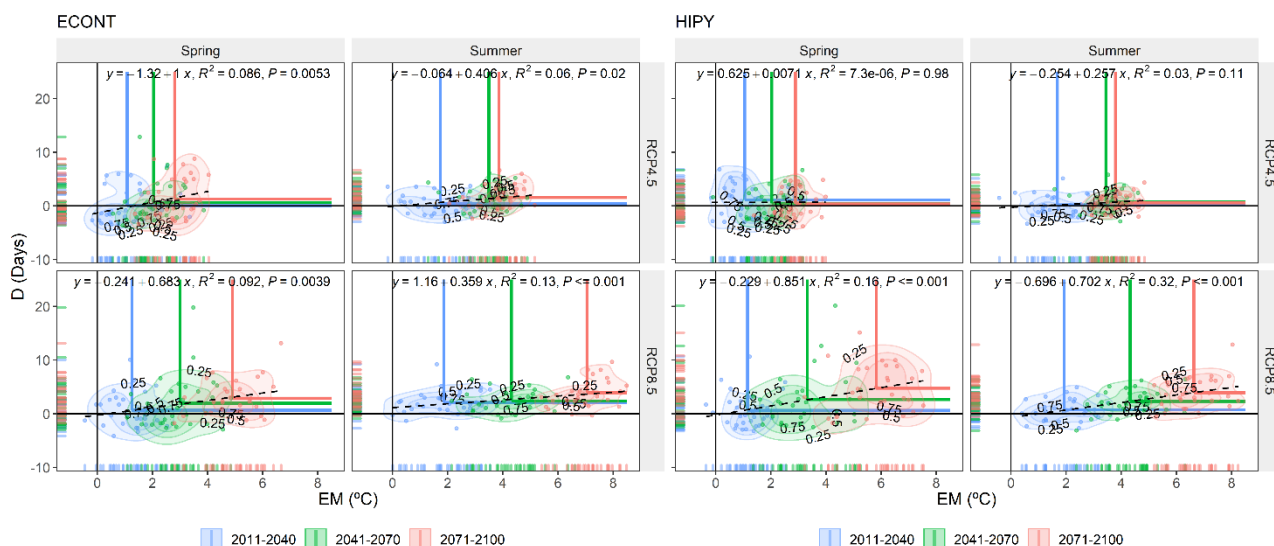

Figure S4. Bivariate probability density functions (scaled from 0 to 1) of D and EM for the three future periods and for the two emission and season scenarios of the ECONT and HIPY regions. The intersection of the blue, green and red horizontal and vertical lines indicates the mean value of the bivariate distribution for each period.

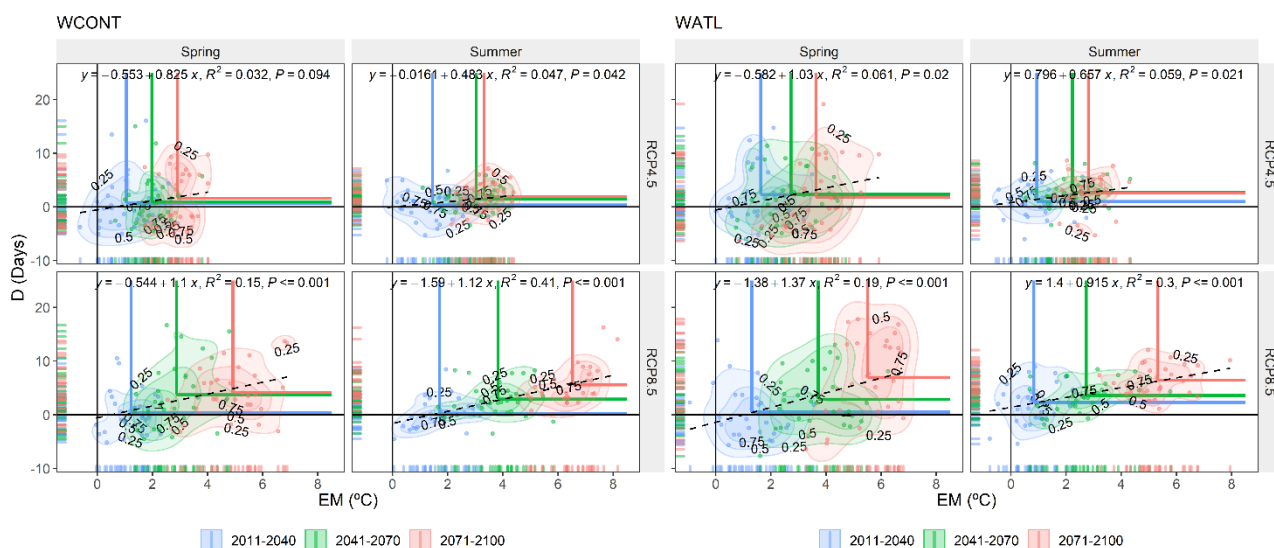

Figure S5. Same as Fig. S5, but for WCONT and WATL.
